# Supplementary material
Source: PubMed Central journal article supplement (PMC7379947)
Supplement: JOIM-285-102-s002.pdf [file JOIM-285-102-s002.pdf]

**Supplementary Table S3 - BAV vs. TAV non-dilated aorta**

| miRNA                                              | Score    | Genes Targeted | Clusters Targeted | pval   |
|----------------------------------------------------|----------|----------------|-------------------|--------|
| miR-200bc/429/548a                                 | 2,875    | 44             | 7                 | 0,0001 |
| miR-27abc/27a-3p                                   | 2,471213 | 41             | 7                 | 0,0022 |
| miR-135ab/135a-5p                                  | 2,264296 | 29             | 7                 | 0,0012 |
| miR-495/1192                                       | 2,256448 | 31             | 8                 | 0,0062 |
| miR-204/204b/211                                   | 2,251015 | 28             | 7                 | 0,0011 |
| miR-133abc                                         | 2,210151 | 27             | 7                 | 0,0013 |
| miR-300/381/539-3p                                 | 2,171962 | 31             | 8                 | 0,0135 |
| miR-128/128ab                                      | 2,170606 | 34             | 7                 | 0,0081 |
| miR-124/124ab/506                                  | 2,167087 | 42             | 8                 | 0,1412 |
| miR-29abcd                                         | 2,099049 | 33             | 7                 | 0,0127 |
| miR-181abcd/4262                                   | 2,072205 | 34             | 8                 | 0,0634 |
| miR-144                                            | 2,066276 | 31             | 7                 | 0,0113 |
| miR-203                                            | 2,041764 | 28             | 8                 | 0,0239 |
| miR-130ac/301ab/301b/301b-3p/454/721/4295/3666     | 2,030016 | 30             | 7                 | 0,0128 |
| miR-590-3p                                         | 2,00667  | 35             | 7                 | 0,0452 |
| miR-96/507/1271                                    | 1,979934 | 30             | 8                 | 0,0642 |
| miR-30abcdef/30abe-5p/384-5p                       | 1,968356 | 34             | 8                 | 0,165  |
| miR-182                                            | 1,956628 | 31             | 8                 | 0,0981 |
| miR-218/218a                                       | 1,92787  | 29             | 7                 | 0,0266 |
| miR-101/101ab                                      | 1,896797 | 27             | 7                 | 0,0233 |
| miR-17/17-5p/20ab/20b-5p/93/106ab/427/518a-3p/519d | 1,890306 | 31             | 8                 | 0,1807 |
| miR-15abc/16/16abc/195/322/424/497/1907            | 1,88889  | 32             | 8                 | 0,2257 |
| miR-9/9ab                                          | 1,799626 | 32             | 7                 | 0,1624 |
| miR-145                                            | 1,768518 | 25             | 6                 | 0,0158 |
| miR-216a                                           | 1,768439 | 14             | 7                 | 0,005  |
| miR-125a-5p/125b-5p/351/670/4319                   | 1,766196 | 26             | 6                 | 0,0199 |
| miR-19ab                                           | 1,760178 | 28             | 8                 | 0,3197 |
| miR-23abc/23b-3p                                   | 1,746462 | 32             | 6                 | 0,0838 |
| miR-148ab-3p/152                                   | 1,720341 | 26             | 5                 | 0,0096 |
| miR-24/24ab/24-3p                                  | 1,705977 | 22             | 6                 | 0,015  |
| miR-539/539-5p                                     | 1,654508 | 19             | 8                 | 0,1286 |
| miR-1ab/206/613                                    | 1,641716 | 25             | 6                 | 0,0508 |
| miR-25/32/92abc/363/363-3p/367                     | 1,622452 | 24             | 7                 | 0,1556 |
| miR-340-5p                                         | 1,547772 | 28             | 7                 | 0,7151 |
| miR-873                                            | 1,495062 | 12             | 7                 | 0,0408 |
| miR-155                                            | 1,482918 | 15             | 7                 | 0,0855 |
| miR-26ab/1297/4465                                 | 1,476837 | 21             | 7                 | 0,3175 |
| miR-142-3p                                         | 1,449795 | 15             | 5                 | 0,0116 |
| miR-137/137ab                                      | 1,395367 | 25             | 6                 | 0,4912 |
| miR-205/205ab                                      | 1,385283 | 17             | 4                 | 0,0101 |
| miR-149                                            | 1,372434 | 15             | 6                 | 0,0748 |
| let-7/98/4458/4500                                 | 1,365062 | 20             | 7                 | 0,721  |
| miR-488                                            | 1,336215 | 13             | 6                 | 0,0687 |

|                                                                                           |          |    |   |        |
|-------------------------------------------------------------------------------------------|----------|----|---|--------|
| miR-150/5127                                                                              | 1,333605 | 11 | 6 | 0,0463 |
| miR-290-5p/292-5p/371-5p/293                                                              | 1,323931 | 12 | 6 | 0,0624 |
| miR-153                                                                                   | 1,292671 | 18 | 6 | 0,2922 |
| miR-183                                                                                   | 1,29151  | 13 | 6 | 0,1037 |
| miR-494                                                                                   | 1,288379 | 16 | 6 | 0,2    |
| miR-374ab                                                                                 | 1,277087 | 19 | 5 | 0,1315 |
| miR-7/7ab                                                                                 | 1,275943 | 12 | 7 | 0,307  |
| miR-410/344de/344b-1-3p                                                                   | 1,267152 | 19 | 5 | 0,1441 |
| miR-377                                                                                   | 1,259961 | 17 | 5 | 0,1013 |
| miR-433                                                                                   | 1,256027 | 11 | 6 | 0,0946 |
| miR-186                                                                                   | 1,241943 | 15 | 7 | 0,7868 |
| miR-455-5p                                                                                | 1,234776 | 8  | 6 | 0,0614 |
| miR-202-3p                                                                                | 1,220674 | 17 | 6 | 0,46   |
| miR-326/330/330-5p                                                                        | 1,218501 | 14 | 5 | 0,0792 |
| miR-103a/107/107ab                                                                        | 1,207463 | 16 | 6 | 0,4214 |
| miR-214/761/3619-5p                                                                       | 1,141398 | 17 | 5 | 0,3019 |
| miR-132/212/212-3p                                                                        | 1,13755  | 13 | 5 | 0,1354 |
| miR-129-5p/129ab-5p                                                                       | 1,133316 | 13 | 6 | 0,4452 |
| miR-22/22-3p                                                                              | 1,124115 | 16 | 4 | 0,0908 |
| miR-31                                                                                    | 1,119835 | 10 | 6 | 0,269  |
| miR-329/329ab/362-3p                                                                      | 1,115886 | 12 | 4 | 0,0424 |
| miR-190/190ab                                                                             | 1,114105 | 8  | 5 | 0,059  |
| miR-93/93a/105/106a/291a-3p/294/295/302abcde/372/373/428/519a/520be/520acd-3p/1378/1420ac | 1,111441 | 15 | 6 | 0,8277 |
| miR-223                                                                                   | 1,103081 | 9  | 6 | 0,2546 |
| miR-320abcd/4429                                                                          | 1,10274  | 20 | 4 | 0,2554 |
| miR-194                                                                                   | 1,095269 | 10 | 6 | 0,3373 |
| miR-342-3p                                                                                | 1,087666 | 11 | 4 | 0,0446 |
| miR-425/425-5p/489                                                                        | 1,079697 | 8  | 5 | 0,081  |
| miR-33a-3p/365/365-3p                                                                     | 1,062156 | 10 | 5 | 0,1447 |
| miR-140/140-5p/876-3p/1244                                                                | 1,057493 | 12 | 4 | 0,0726 |
| miR-335/335-5p                                                                            | 1,051235 | 10 | 4 | 0,0506 |
| miR-138/138ab                                                                             | 1,047543 | 11 | 6 | 0,6454 |
| miR-592/599                                                                               | 1,046431 | 9  | 4 | 0,0429 |
| miR-141/200a                                                                              | 1,021289 | 18 | 4 | 0,3558 |
| miR-543                                                                                   | 1,008182 | 15 | 5 | 0,6775 |
| miR-34ac/34bc-5p/449abc/449c-5p                                                           | 1,000893 | 14 | 5 | 0,5877 |
| miR-224                                                                                   | 0,98261  | 12 | 4 | 0,1447 |
| miR-143/1721/4770                                                                         | 0,968544 | 10 | 5 | 0,3427 |
| miR-448/448-3p                                                                            | 0,95564  | 13 | 5 | 0,7232 |
| miR-421                                                                                   | 0,945048 | 10 | 5 | 0,4255 |
| miR-154/872                                                                               | 0,932469 | 6  | 4 | 0,0654 |
| miR-505/505-3p                                                                            | 0,917117 | 8  | 4 | 0,1145 |
| miR-136                                                                                   | 0,91024  | 7  | 5 | 0,3129 |
| miR-499-5p                                                                                | 0,892029 | 8  | 5 | 0,4562 |

|                               |          |    |   |        |
|-------------------------------|----------|----|---|--------|
| miR-221/222/222ab/1928        | 0,886575 | 9  | 5 | 0,5914 |
| miR-544/544ab/544-3p          | 0,8852   | 10 | 5 | 0,7384 |
| miR-376abd/376b-3p            | 0,872741 | 6  | 5 | 0,3585 |
| miR-382                       | 0,871178 | 6  | 5 | 0,3637 |
| miR-384/384-3p                | 0,84581  | 7  | 5 | 0,5664 |
| miR-219-5p/508/508-3p/4782-3p | 0,836789 | 10 | 4 | 0,3647 |
| miR-874                       | 0,824123 | 6  | 5 | 0,561  |
| miR-370                       | 0,823955 | 7  | 5 | 0,6927 |
| miR-28-5p/708/1407/1653/3139  | 0,820328 | 8  | 3 | 0,0883 |
| miR-216b/216b-5p              | 0,817689 | 8  | 4 | 0,2861 |
| miR-199ab-5p                  | 0,817608 | 11 | 4 | 0,5365 |
| miR-33ab/33-5p                | 0,815354 | 10 | 4 | 0,4443 |
| miR-139-5p                    | 0,810806 | 9  | 4 | 0,3758 |
| miR-21/590-5p                 | 0,80497  | 10 | 3 | 0,1546 |
| miR-217                       | 0,786108 | 6  | 5 | 0,7962 |
| miR-504/4725-5p               | 0,783874 | 7  | 3 | 0,1002 |
| miR-876-5p/3167               | 0,755992 | 8  | 3 | 0,1597 |
| miR-196abc                    | 0,749419 | 7  | 4 | 0,4352 |
| miR-485-5p/1698/1703/1962     | 0,748479 | 8  | 4 | 0,5412 |
| miR-378/422a/378bcdefhi       | 0,722647 | 5  | 4 | 0,3664 |
| miR-299/299-3p/3563-3p        | 0,721936 | 4  | 3 | 0,0946 |
| miR-490-3p                    | 0,711318 | 5  | 4 | 0,4067 |
| miR-542-3p                    | 0,698332 | 6  | 4 | 0,5651 |
| miR-197                       | 0,683311 | 7  | 3 | 0,253  |
| miR-296-3p                    | 0,679308 | 4  | 2 | 0,0443 |
| miR-361-5p                    | 0,675471 | 5  | 4 | 0,5658 |
| miR-338/338-3p                | 0,674872 | 6  | 4 | 0,7014 |
| miR-375                       | 0,661651 | 5  | 4 | 0,6426 |
| miR-376c/741-5p               | 0,659742 | 5  | 4 | 0,654  |
| miR-503                       | 0,652739 | 6  | 4 | 0,86   |
| miR-486-5p/3107               | 0,651463 | 5  | 3 | 0,2232 |
| miR-208ab/208ab-3p            | 0,642794 | 4  | 4 | 0,6201 |
| miR-10abc/10a-5p              | 0,636158 | 7  | 3 | 0,3906 |
| miR-18ab/4735-3p              | 0,634969 | 7  | 3 | 0,3949 |
| miR-487b                      | 0,632151 | 2  | 2 | 0,045  |
| miR-383                       | 0,618383 | 5  | 3 | 0,3027 |
| miR-339b/339-5p/3586-5p       | 0,593719 | 5  | 3 | 0,3799 |
| miR-122/122a/1352             | 0,592865 | 5  | 3 | 0,3829 |
| miR-346                       | 0,578505 | 4  | 3 | 0,3545 |
| miR-185/882/3473/4306/4644    | 0,567243 | 6  | 3 | 0,5977 |
| miR-328a/328b-3p              | 0,558824 | 5  | 3 | 0,5239 |
| miR-193/193b/193a-3p          | 0,553625 | 5  | 3 | 0,5496 |
| miR-411                       | 0,530048 | 3  | 3 | 0,4493 |
| miR-146ac/146b-5p             | 0,505507 | 4  | 3 | 0,6944 |
| miR-125a-3p/1554              | 0,504852 | 4  | 3 | 0,6986 |
| miR-653                       | 0,5038   | 4  | 3 | 0,7054 |

|                      |          |   |   |        |
|----------------------|----------|---|---|--------|
| miR-192/215          | 0,495031 | 3 | 3 | 0,6203 |
| miR-491-5p           | 0,488098 | 5 | 2 | 0,3178 |
| miR-324-5p           | 0,442173 | 4 | 2 | 0,3935 |
| miR-379/1193-5p/3529 | 0,424993 | 3 | 2 | 0,3739 |
| miR-431              | 0,420305 | 4 | 2 | 0,4813 |
| miR-875-5p           | 0,397015 | 3 | 2 | 0,4838 |
| miR-126-3p           | 0,378773 | 2 | 1 | 0,1468 |
| miR-551a             | 0,361428 | 1 | 1 | 0,1397 |
| miR-451              | 0,254596 | 1 | 1 | 0,3737 |
| miR-184              | 0,234521 | 1 | 1 | 0,4496 |
| miR-191              | 0,182194 | 1 | 1 | 0,728  |
| miR-134/3118         | 0,151202 | 1 | 1 | 0,9685 |
| miR-99ab/100         | 0        | 0 | 0 | 1      |
| miR-758              | 0        | 0 | 0 | 1      |
| miR-615-3p           | 0        | 0 | 0 | 1      |
| miR-496              | 0        | 0 | 0 | 1      |
| miR-450a/451a        | 0        | 0 | 0 | 1      |
| miR-210              | 0        | 0 | 0 | 1      |
| miR-187              | 0        | 0 | 0 | 1      |
| miR-127/127-3p       | 0        | 0 | 0 | 1      |

**Supplementary Table S3 - BAV vs. TAV dilated aorta**

| miRNA                                          | Score    | Genes Targeted | Clusters Targeted | pval    |
|------------------------------------------------|----------|----------------|-------------------|---------|
| miR-124/124ab/506                              | 2,924743 | 152            | 8                 | 0,0002  |
| miR-23abc/23b-3p                               | 2,75     | 114            | 8                 | <0.0001 |
| miR-200bc/429/548a                             | 2,480263 | 111            | 6                 | <0.0001 |
| miR-1ab/206/613                                | 2,434211 | 85             | 7                 | <0.0001 |
| miR-181abcd/4262                               | 2,275457 | 117            | 5                 | 0,0003  |
| miR-144                                        | 2,236842 | 93             | 5                 | <0.0001 |
| miR-203                                        | 2,20234  | 81             | 8                 | 0,0021  |
| miR-15abc/16/16abc/195/322/424/497/1907        | 2,166147 | 115            | 6                 | 0,0023  |
| miR-145                                        | 2,144737 | 79             | 5                 | 0,0001  |
| miR-96/507/1271                                | 2,12781  | 97             | 6                 | 0,0011  |
| miR-30abcdef/30abe-5p/384-5p                   | 2,100767 | 115            | 6                 | 0,0042  |
| miR-300/381/539-3p                             | 2,041504 | 89             | 6                 | 0,0015  |
| miR-182                                        | 2,002082 | 100            | 6                 | 0,0042  |
| miR-218/218a                                   | 1,999252 | 89             | 5                 | 0,0007  |
| miR-130ac/301ab/301b/301b-3p/454/721/4295/3666 | 1,910784 | 89             | 4                 | 0,0005  |
| miR-9/9ab                                      | 1,906525 | 108            | 5                 | 0,0052  |
| miR-340-5p                                     | 1,893878 | 116            | 6                 | 0,03    |
| miR-495/1192                                   | 1,889759 | 86             | 5                 | 0,0016  |
| miR-27abc/27a-3p                               | 1,886339 | 99             | 7                 | 0,0363  |
| miR-320abcd/4429                               | 1,857214 | 74             | 6                 | 0,0033  |
| miR-590-3p                                     | 1,851482 | 98             | 7                 | 0,0471  |
| miR-21/590-5p                                  | 1,724485 | 38             | 5                 | 0,0004  |

|                                                                                           |          |     |   |        |
|-------------------------------------------------------------------------------------------|----------|-----|---|--------|
| miR-19ab                                                                                  | 1,711269 | 96  | 6 | 0,048  |
| miR-25/32/92abc/363/363-3p/367                                                            | 1,688191 | 74  | 7 | 0,0495 |
| miR-17/17-5p/20ab/20b-5p/93/106ab/427/518a-3p/519d                                        | 1,669565 | 100 | 5 | 0,0284 |
| miR-204/204b/211                                                                          | 1,668883 | 68  | 4 | 0,0013 |
| miR-150/5127                                                                              | 1,654146 | 34  | 5 | 0,0006 |
| miR-543                                                                                   | 1,61768  | 64  | 7 | 0,0517 |
| miR-425/425-5p/489                                                                        | 1,571568 | 26  | 6 | 0,0025 |
| miR-499-5p                                                                                | 1,567761 | 39  | 5 | 0,0018 |
| miR-133abc                                                                                | 1,567064 | 62  | 5 | 0,0073 |
| miR-28-5p/708/1407/1653/3139                                                              | 1,565789 | 29  | 3 | 0      |
| miR-205/205ab                                                                             | 1,542283 | 46  | 4 | 0,0011 |
| miR-199ab-5p                                                                              | 1,540644 | 50  | 5 | 0,0045 |
| miR-101/101ab                                                                             | 1,51436  | 73  | 5 | 0,0231 |
| miR-377                                                                                   | 1,5065   | 52  | 6 | 0,022  |
| miR-488                                                                                   | 1,499791 | 41  | 5 | 0,0038 |
| miR-29abcd                                                                                | 1,494378 | 80  | 6 | 0,1342 |
| miR-410/344de/344b-1-3p                                                                   | 1,491065 | 62  | 5 | 0,0147 |
| miR-24/24ab/24-3p                                                                         | 1,48761  | 55  | 6 | 0,0314 |
| miR-148ab-3p/152                                                                          | 1,476826 | 62  | 6 | 0,053  |
| miR-135ab/135a-5p                                                                         | 1,446265 | 61  | 6 | 0,0661 |
| miR-125a-5p/125b-5p/351/670/4319                                                          | 1,431066 | 60  | 7 | 0,2263 |
| miR-374ab                                                                                 | 1,400382 | 56  | 6 | 0,0745 |
| miR-137/137ab                                                                             | 1,398048 | 87  | 5 | 0,1575 |
| miR-103a/107/107ab                                                                        | 1,386319 | 57  | 6 | 0,0901 |
| miR-143/1721/4770                                                                         | 1,364122 | 37  | 6 | 0,0329 |
| miR-142-3p                                                                                | 1,359672 | 40  | 3 | 0,0013 |
| miR-128/128ab                                                                             | 1,34957  | 84  | 4 | 0,0649 |
| miR-153                                                                                   | 1,343822 | 61  | 5 | 0,0537 |
| miR-539/539-5p                                                                            | 1,331745 | 57  | 5 | 0,0471 |
| miR-186                                                                                   | 1,328198 | 67  | 5 | 0,0892 |
| miR-214/761/3619-5p                                                                       | 1,318567 | 58  | 5 | 0,0565 |
| miR-33ab/33-5p                                                                            | 1,318399 | 41  | 5 | 0,0202 |
| miR-155                                                                                   | 1,304825 | 46  | 4 | 0,0098 |
| miR-494                                                                                   | 1,302884 | 54  | 4 | 0,0162 |
| miR-221/222/222ab/1928                                                                    | 1,296563 | 41  | 5 | 0,0247 |
| miR-339b/339-5p/3586-5p                                                                   | 1,275028 | 23  | 4 | 0,0032 |
| miR-139-5p                                                                                | 1,262496 | 35  | 5 | 0,0235 |
| miR-202-3p                                                                                | 1,25582  | 56  | 6 | 0,2821 |
| let-7/98/4458/4500                                                                        | 1,254337 | 69  | 6 | 0,6287 |
| miR-93/93a/105/106a/291a-3p/294/295/302abcde/372/373/428/519a/520be/520acd-3p/1378/1420ac | 1,248438 | 61  | 6 | 0,4088 |
| miR-421                                                                                   | 1,240117 | 39  | 5 | 0,0368 |
| miR-33a-3p/365/365-3p                                                                     | 1,224372 | 31  | 5 | 0,0262 |
| miR-26ab/1297/4465                                                                        | 1,202886 | 65  | 5 | 0,2506 |
| miR-141/200a                                                                              | 1,128875 | 56  | 5 | 0,2872 |

|                              |          |    |   |        |
|------------------------------|----------|----|---|--------|
| miR-22/22-3p                 | 1,106175 | 48 | 3 | 0,0218 |
| miR-132/212/212-3p           | 1,089013 | 36 | 5 | 0,1234 |
| miR-329/329ab/362-3p         | 1,076311 | 31 | 4 | 0,0324 |
| miR-433                      | 1,075434 | 29 | 5 | 0,0915 |
| miR-592/599                  | 1,047327 | 21 | 5 | 0,073  |
| miR-183                      | 1,035625 | 39 | 3 | 0,0242 |
| miR-544/544ab/544-3p         | 1,031026 | 41 | 5 | 0,285  |
| miR-208ab/208ab-3p           | 1,030946 | 19 | 5 | 0,0752 |
| miR-455-5p                   | 1,023687 | 21 | 4 | 0,0287 |
| miR-290-5p/292-5p/371-5p/293 | 1,014831 | 25 | 6 | 0,3968 |
| miR-197                      | 1,014677 | 24 | 4 | 0,0374 |
| miR-31                       | 1,00994  | 33 | 4 | 0,0674 |
| miR-138/138ab                | 1,008904 | 48 | 3 | 0,0534 |
| miR-873                      | 1,006672 | 27 | 5 | 0,1527 |
| miR-485-5p/1698/1703/1962    | 1,005986 | 33 | 4 | 0,0699 |
| miR-338/338-3p               | 1,004288 | 30 | 4 | 0,0592 |
| miR-216b/216b-5p             | 0,997792 | 25 | 5 | 0,1468 |
| miR-361-5p                   | 0,987721 | 21 | 5 | 0,1264 |
| miR-411                      | 0,971534 | 15 | 3 | 0,0102 |
| miR-223                      | 0,96721  | 29 | 4 | 0,0784 |
| miR-224                      | 0,966541 | 34 | 4 | 0,1068 |
| miR-758                      | 0,965225 | 21 | 5 | 0,1555 |
| miR-149                      | 0,958467 | 38 | 4 | 0,1466 |
| miR-194                      | 0,954289 | 30 | 5 | 0,2967 |
| miR-7/7ab                    | 0,93645  | 41 | 3 | 0,0681 |
| miR-335/335-5p               | 0,932122 | 24 | 4 | 0,08   |
| miR-376c/741-5p              | 0,923484 | 21 | 5 | 0,2284 |
| miR-490-3p                   | 0,917727 | 17 | 5 | 0,189  |
| miR-448/448-3p               | 0,916221 | 49 | 4 | 0,4213 |
| miR-382                      | 0,911617 | 19 | 5 | 0,2257 |
| miR-505/505-3p               | 0,911521 | 19 | 5 | 0,2259 |
| miR-383                      | 0,903483 | 15 | 5 | 0,1909 |
| miR-376abd/376b-3p           | 0,893271 | 21 | 4 | 0,0954 |
| miR-503                      | 0,884781 | 32 | 4 | 0,2009 |
| miR-193/193b/193a-3p         | 0,873932 | 21 | 4 | 0,114  |
| miR-217                      | 0,854446 | 29 | 4 | 0,2215 |
| miR-196abc                   | 0,849349 | 21 | 5 | 0,4521 |
| miR-326/330/330-5p           | 0,8251   | 32 | 4 | 0,3481 |
| miR-18ab/4735-3p             | 0,823166 | 23 | 4 | 0,2054 |
| miR-375                      | 0,819529 | 18 | 5 | 0,4961 |
| miR-370                      | 0,808627 | 23 | 5 | 0,7426 |
| miR-384/384-3p               | 0,805158 | 21 | 5 | 0,6792 |
| miR-190/190ab                | 0,78784  | 17 | 4 | 0,1977 |
| miR-10abc/10a-5p             | 0,785288 | 27 | 2 | 0,0371 |
| miR-431                      | 0,779677 | 17 | 3 | 0,0674 |
| miR-129-5p/129ab-5p          | 0,77266  | 36 | 4 | 0,719  |

|                                 |          |    |   |        |
|---------------------------------|----------|----|---|--------|
| miR-140/140-5p/876-3p/1244      | 0,769901 | 29 | 3 | 0,1526 |
| miR-216a                        | 0,742873 | 22 | 4 | 0,405  |
| miR-34ac/34bc-5p/449abc/449c-5p | 0,742304 | 46 | 3 | 0,5512 |
| miR-219-5p/508/508-3p/4782-3p   | 0,738017 | 27 | 4 | 0,5734 |
| miR-185/882/3473/4306/4644      | 0,731316 | 21 | 4 | 0,424  |
| miR-126-3p                      | 0,728714 | 6  | 2 | 0,0175 |
| miR-496                         | 0,728299 | 13 | 3 | 0,0849 |
| miR-328a/328b-3p                | 0,72751  | 20 | 3 | 0,1307 |
| miR-542-3p                      | 0,690169 | 23 | 3 | 0,2211 |
| miR-125a-3p/1554                | 0,688129 | 19 | 3 | 0,1768 |
| miR-134/3118                    | 0,680073 | 12 | 4 | 0,394  |
| miR-136                         | 0,669812 | 17 | 4 | 0,5863 |
| miR-876-5p/3167                 | 0,654859 | 20 | 3 | 0,2552 |
| miR-874                         | 0,646372 | 22 | 3 | 0,3115 |
| miR-324-5p                      | 0,627344 | 15 | 2 | 0,0768 |
| miR-486-5p/3107                 | 0,622916 | 13 | 3 | 0,2241 |
| miR-378/422a/378bcdefhi         | 0,604286 | 11 | 4 | 0,7453 |
| miR-346                         | 0,601718 | 12 | 3 | 0,2564 |
| miR-342-3p                      | 0,579772 | 20 | 3 | 0,5096 |
| miR-653                         | 0,572104 | 10 | 4 | 0,9435 |
| miR-146ac/146b-5p               | 0,57202  | 19 | 2 | 0,1629 |
| miR-154/872                     | 0,570101 | 11 | 3 | 0,3229 |
| miR-487b                        | 0,533247 | 3  | 2 | 0,0883 |
| miR-122/122a/1352               | 0,528174 | 13 | 3 | 0,5363 |
| miR-875-5p                      | 0,520522 | 9  | 3 | 0,4516 |
| miR-491-5p                      | 0,470746 | 14 | 2 | 0,3058 |
| miR-450a/451a                   | 0,449763 | 2  | 2 | 0,1793 |
| miR-296-3p                      | 0,435898 | 6  | 2 | 0,2596 |
| miR-379/1193-5p/3529            | 0,404006 | 8  | 2 | 0,3931 |
| miR-191                         | 0,384297 | 5  | 2 | 0,393  |
| miR-504/4725-5p                 | 0,379838 | 12 | 2 | 0,6258 |
| miR-192/215                     | 0,326426 | 8  | 2 | 0,8032 |
| miR-184                         | 0,324494 | 2  | 2 | 0,5684 |
| miR-210                         | 0,30519  | 2  | 2 | 0,679  |
| miR-299/299-3p/3563-3p          | 0,277453 | 3  | 2 | 0,9314 |
| miR-551a                        | 0,228834 | 1  | 1 | 0,4083 |
| miR-99ab/100                    | 0,209101 | 4  | 1 | 0,5873 |
| miR-615-3p                      | 0,17929  | 1  | 1 | 0,6444 |
| miR-451                         | 0,157958 | 1  | 1 | 0,7843 |
| miR-187                         | 0        | 0  | 0 | 1      |
| miR-127/127-3p                  | 0        | 0  | 0 | 1      |
